# Supplementary material for: Synergistic magnetoelectric enhancement in 0–3 particulate multiferroic composites: unveiling the exceptional interplay of Ba 0.85 Sm 0.15 TiO 3 and Co 0.85 Sm 0.15 Fe 2 O 4 phases for superior energy conversion
Source: Royal Society of Chemistry journal article supplement (doi:10.1039/d4ra01360c), 2024-01-01
Supplement: d4ra01360c1.pdf [file d4ra01360c1.pdf]

## Supporting Data

### EDS data

**Table 1:** Weight percentage of elements of composites  $(1-x)\text{SmBT}-x\text{SmCF}$  ( $x = 0.00, 1.0, 0.02, 0.04, 0.06$ ).

| <b>Element</b> | <b>Weight %<br/>SmBT</b> | <b>Weight %<br/>SmCF</b> | <b>Weight %<br/>SmBT-SmCF<br/>(0.02)</b> | <b>Weight %<br/>SmBT-SmCF<br/>(0.04)</b> | <b>Weight %<br/>SmBT-SmCF<br/>(0.06)</b> |
|----------------|--------------------------|--------------------------|------------------------------------------|------------------------------------------|------------------------------------------|
| <b>O K</b>     | 20.41                    | 25.74                    | 20.52                                    | 20.62                                    | 20.73                                    |
| <b>Ti K</b>    | 20.35                    | -                        | 19.94                                    | 19.54                                    | 19.13                                    |
| <b>Sm K</b>    | 9.5                      | 9.07                     | 9.49                                     | 9.48                                     | 19.47                                    |
| <b>Fe K</b>    | -                        | 45.04                    | 0.90                                     | 1.80                                     | 2.7                                      |
| <b>Co K</b>    | -                        | 20.15                    | 0.40                                     | 0.81                                     | 1.21                                     |
| <b>Ba L</b>    | 49.64                    | -                        | 48.65                                    | 47.65                                    | 46.66                                    |

### Raman Spectra

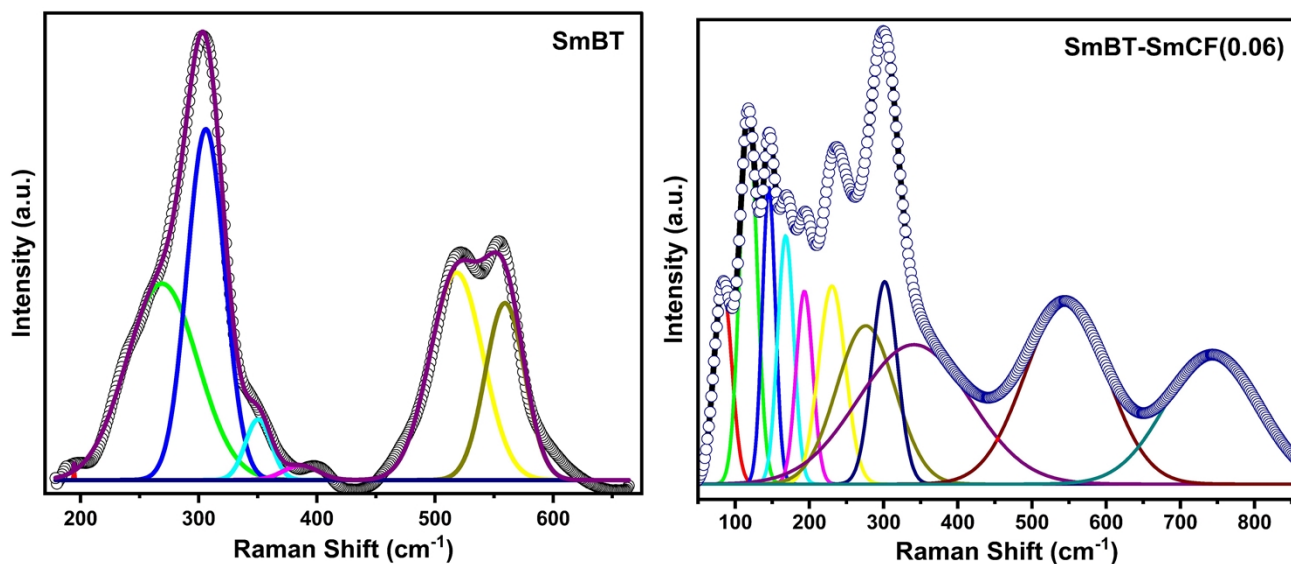

**Figure 1:** Deconvoluted Raman spectra of composite  $(1-x)\text{SmBT}-x\text{SmCF}$  ( $x=0.00, 0.06$ ).

## X-ray photoelectron spectroscopy

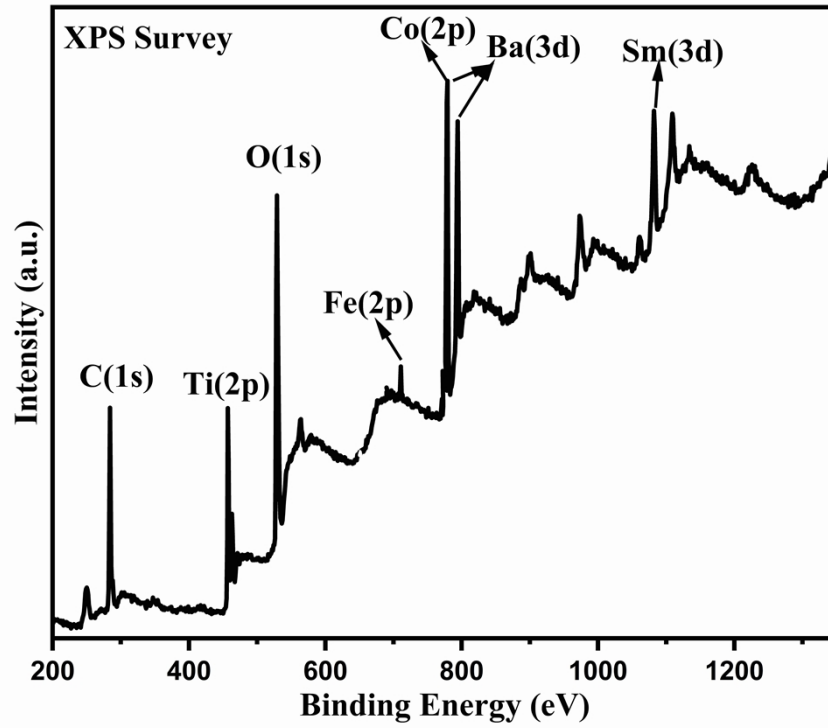

**Figure 2:** XPS survey spectrum of  $(1-x)\text{SmBT}-x\text{SmCF}$ .

**Table 2:** XPS peak positions and FWHM values of  $(1-x)\text{SmBT}-x\text{SmCF}$ .

| Element Name | Levels                  | Fitted peak position<br>(eV) | FWHM (eV) |
|--------------|-------------------------|------------------------------|-----------|
| Ba 3d        | $3d_{5/2}$ , $3d_{3/2}$ | 794.81, 779.45               | 3.24      |
| Ti 2p        | $2p_{3/2}$ , $2p_{1/2}$ | 457.9, 463.71                | 2.45      |
| Sm 3d        | $3d_{5/2}$ , $3d_{3/2}$ | 1083.08, 1109.43             | 2.13      |
| Co 2p        | $2p_{3/2}$ , $2p_{1/2}$ | 779.7, 796.4                 | 3.20      |
| Fe 2p        | $2p_{3/2}$ , $2p_{1/2}$ | 710.5, 733.4, 724.6          | 3.31      |
| O 1s         | 1s                      | 529.38, 532.24               | 1.20      |
